# Supplementary material
Source: publisher site journal article supplement (https://www.dovepress.com/article/453509)

Supplementary Figure 1. COTL1 expression in THCA and KIPR based from UALCAN database. A. COTL1 expression in THCA. B. COTL1 expression in KIRP. *<0.05. ***<0.001.


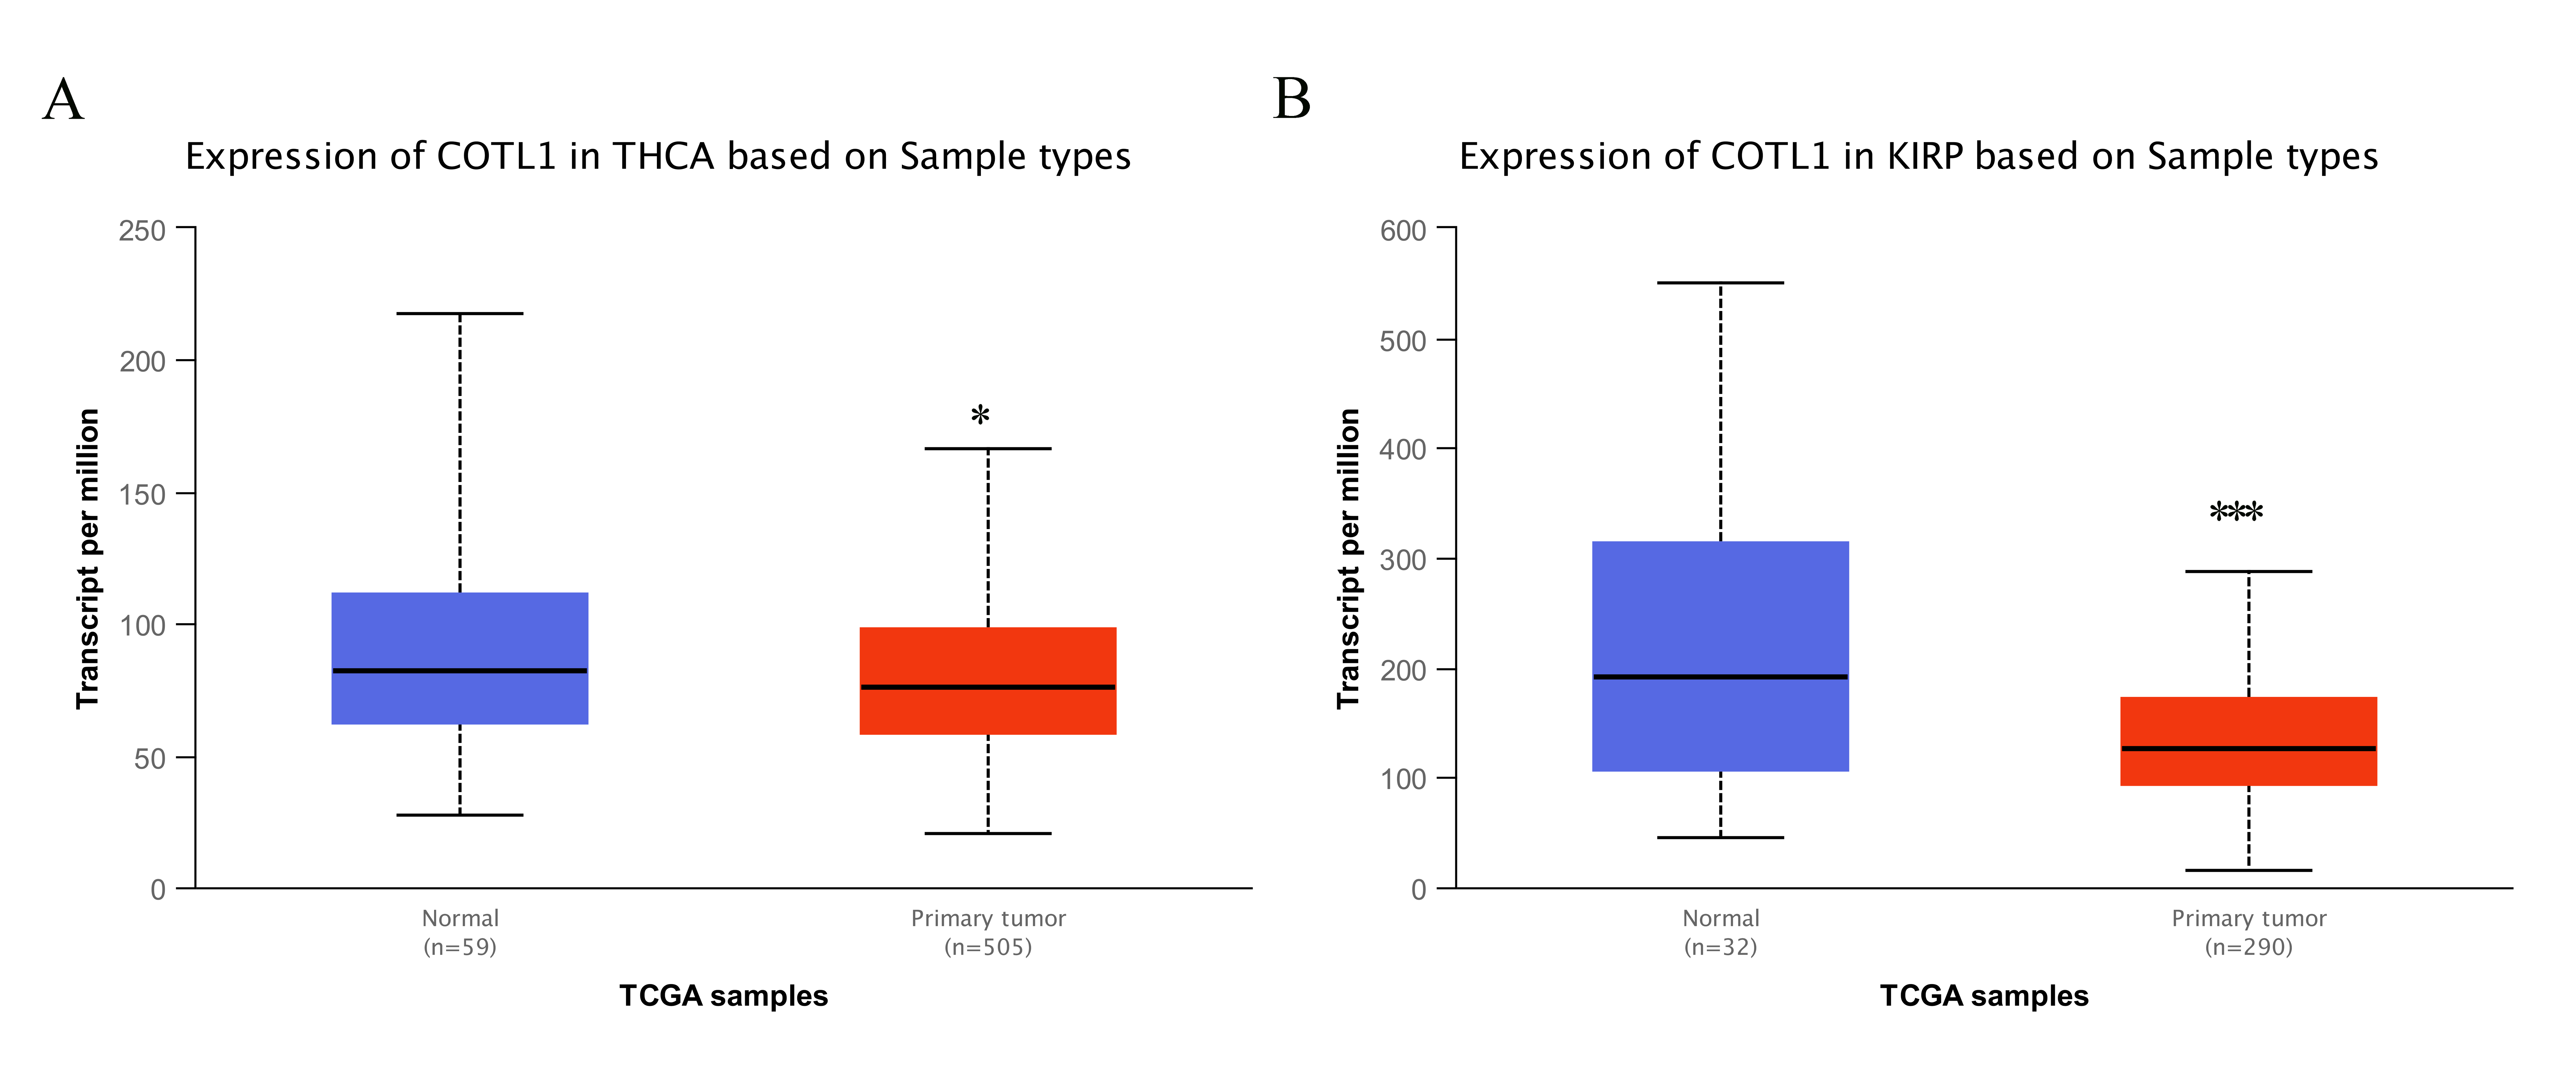


Supplementary Figure 2. Correlation of COTL1 mutation with patient survival analysis. A. Overall survival. B. Disease specific survival. C. Disease free survival. D. Progress free survival.


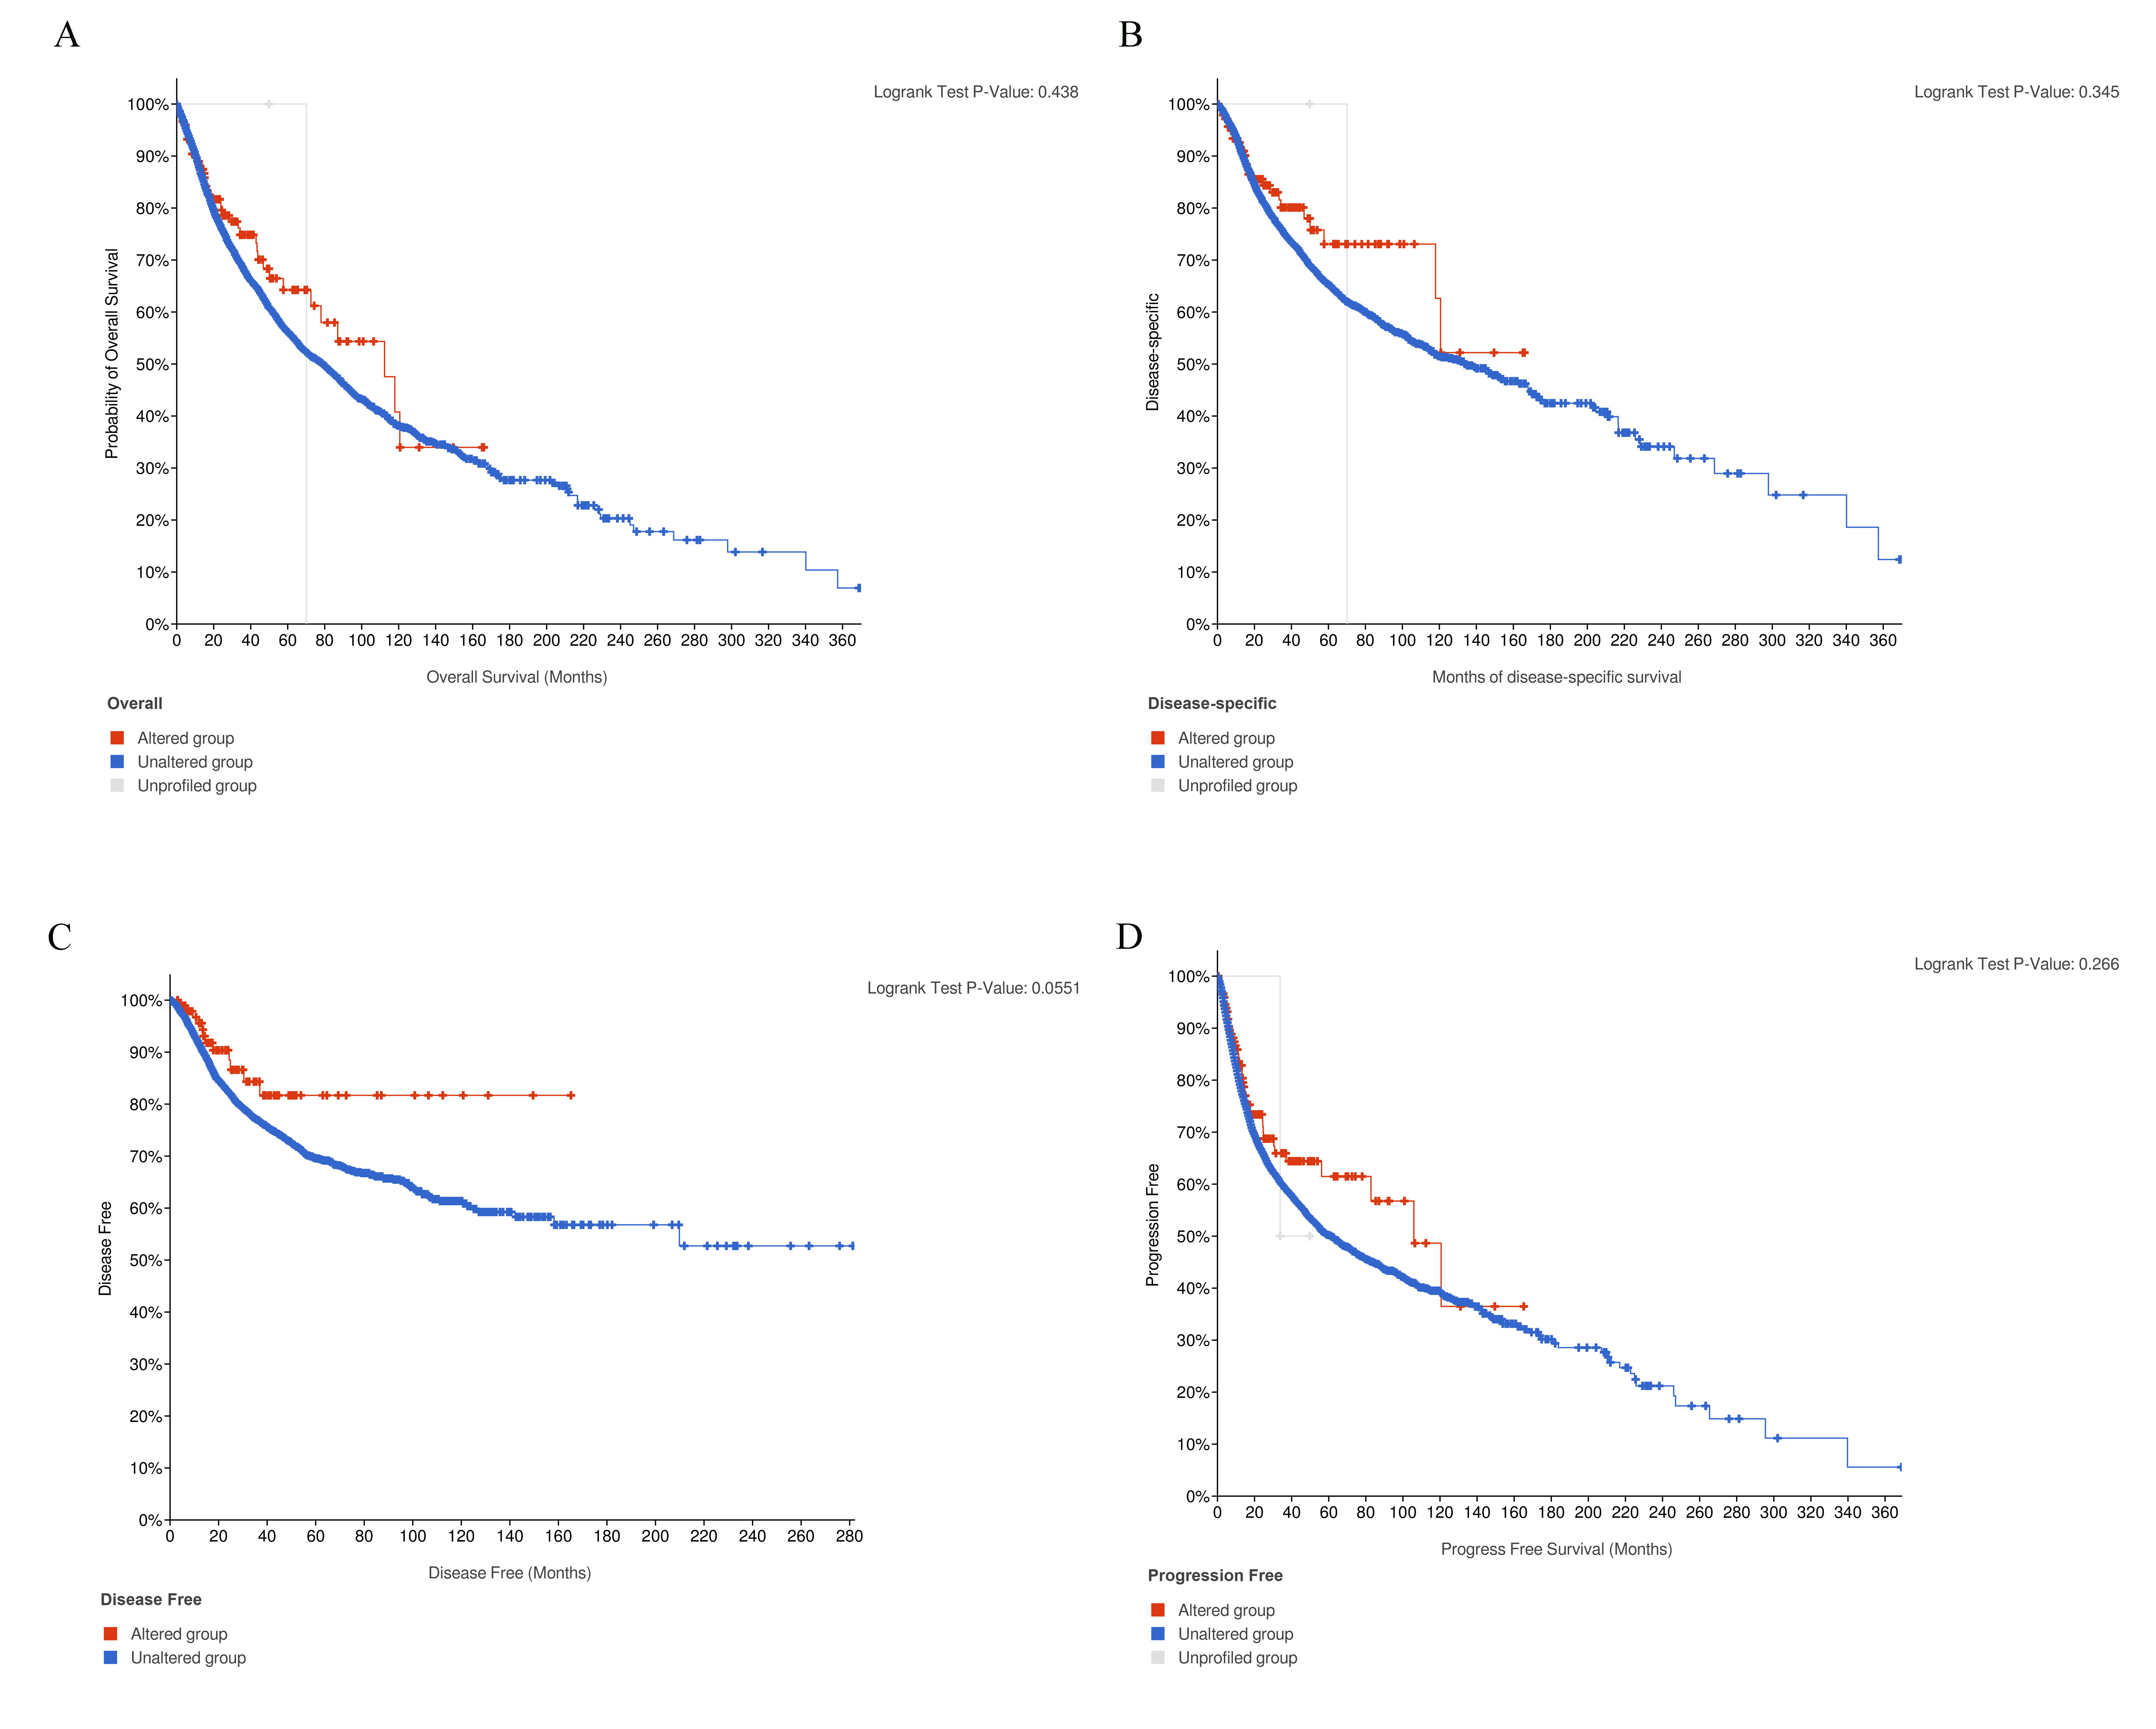

Supplement: Supplementary file 1 [file get_supplementary_file.php]
